# Supplementary material for: Human-Activity-Mediated Gene Flows Are Involved in the Establishment of Magnaporthe oryzae Population Structures: A Population Genomic Analysis
Source: Preprints.org preprint supplement (doi:10.20944/preprints202408.2221.v1), 2024-08-30
Supplement: Supplementary file 1 [file Table S1 genome information of M. oryzae strains.xls]

## Sheet: 1.strain information
Strain	Host	Region	Country	Time	NCBI accession no.
BN0293	Oryza sativa	Africa	Benin	2011	SAMEA4753516
BF17	Oryza sativa	Africa	Burkina Faso	2013	SAMEA4753513
BF32	Oryza sativa	Africa	Burkina Faso	2013	SAMEA4753514
BF48	Oryza sativa	Africa	Burkina Faso	2013	SAMEA4753515
BF5	Oryza sativa	Africa	Burkina Faso	2013	SAMEA4753512
EG308	Oryza sativa	Africa	Egypt	1999	SAMEA4753505
KA1-3-1	Oryza sativa	Africa	Ghana	2015	SAMN06050109
KA2-1-1	Oryza sativa	Africa	Ghana	2015	SAMN06050110
WD-3-1_1	Oryza sativa	Africa	Ghana	2015	SAMN06050134
AV1-1-1	Oryza sativa	Africa	Ghana	2015	SAMN06050065
KE002	Oryza sativa	Africa	Kenya	2013	SAMEA4753505
KE016	Oryza sativa	Africa	Kenya	2013	SAMEA4753507
KE017	Oryza sativa	Africa	Kenya	2013	SAMEA4753508
KE019	Oryza sativa	Africa	Kenya	2013	SAMEA4753509
KE021	Oryza sativa	Africa	Kenya	2013	SAMEA4753510
KE029	Oryza sativa	Africa	Kenya	2013	SAMEA4753511
KE041	Oryza sativa	Africa	Kenya	2013	SAMEA4753518
KE210	Oryza sativa	Africa	Kenya	2014	SAMEA4753519
KE255	Oryza sativa	Africa	Kenya	2014	SAMEA4753520
KE332	Oryza sativa	Africa	Kenya	2014	SAMEA4753528
KE415	Oryza sativa	Africa	Kenya	2014	SAMEA4753529
KE443	Oryza sativa	Africa	Kenya	2014	SAMEA4753530
KE473	Oryza sativa	Africa	Kenya	2014	SAMEA4753531
KE491	Oryza sativa	Africa	Kenya	2014	SAMEA4753532
ML33	Oryza sativa	Africa	Mali	1995	SAMN08009565
NG0104	Oryza sativa	Africa	Nigeria	2010	SAMEA4753521
NG0110	Oryza sativa	Africa	Nigeria	2010	SAMEA4753522
NG0135	Oryza sativa	Africa	Nigeria	2009	SAMEA4753523
NG0153	Oryza sativa	Africa	Nigeria	2009	SAMEA4753524
VO104	Oryza sativa	North America	USA: Puerto Rico	1987	SAMEA4751775
TZ090	Oryza sativa	Africa	Tanzania	2013	SAMEA4753526
TG004	Oryza sativa	Africa	Togo	2012	SAMEA4753525
UG08	Oryza sativa	Africa	Uganda	2013	SAMEA4753527
90_4_1	Oryza sativa	Aisa	China	1993	SAMEA4751764
AH06	Oryza sativa	Aisa	China	2000	SAMN02740625
Glhn4	Oryza sativa	Aisa	China	1990	SAMEA4751768
Mo76-3	Oryza sativa	Aisa	China	1990	SAMEA4751761
ZJ15	Oryza sativa	Aisa	China	1998	SAMN02740637
MG02	Oryza sativa	Aisa	India	2011	SAMN04216992
MG10	Oryza sativa	Aisa	India	2011	SAMN04217083
Mo1106.2	Oryza sativa	Aisa	Japan	1976	SAMN02739886
Mo2303.1	Oryza sativa	Aisa	Japan	1976	SAMN02739932
13FM-16-1	Oryza sativa	Asia	China	2013	SAMN06050060
13FM-24-1	Oryza sativa	Asia	China	2013	SAMN06050061
13FM-3-2	Oryza sativa	Asia	China	2013	SAMN06050062
13FM-5-1	Oryza sativa	Asia	China	2013	SAMN06050063
13FM-9-1	Oryza sativa	Asia	China	2013	SAMN06050064
BJ08-8	Oryza sativa	Asia	China	1980s	SAMN06050067
BJ-90-611	Oryza sativa	Asia	China	1990s	SAMN06050066
CQ11	Oryza sativa	Asia	China	2000	SAMN02740626
DB11-621	Oryza sativa	Asia	China	2011	SAMN06050068
EA18	Oryza sativa	Asia	China	2021	SAMN25211060
FJ0204804	Oryza sativa	Asia	China	2002	SAMN06050069
FJ11SH-527-1	Oryza sativa	Asia	China	2011	SAMN06050070
FJ11YD-673-1	Oryza sativa	Asia	China	2011	SAMN06050071
FJ12JN-084-3	Oryza sativa	Asia	China	2012	SAMN06050072
FJ13SH05-2	Oryza sativa	Asia	China	2013	SAMN06050073
FJ2000-62A	Oryza sativa	Asia	China	2000	SAMN06050074
FJ2000-69A	Oryza sativa	Asia	China	2000	SAMN06050075
FJ2001-112B	Oryza sativa	Asia	China	2001	SAMN06050076
FJ2003-001A1	Oryza sativa	Asia	China	2003	SAMN06050077
FJ2005113B	Oryza sativa	Asia	China	2005	SAMN06050078
FJ2006-60A3	Oryza sativa	Asia	China	2006	SAMN06050079
FJ43ZB15-68	Oryza sativa	Asia	China	1992	SAMN06050080
FJ72ZC7-77	Oryza sativa	Asia	China	1992	SAMN06050081
FJ78-JJ	Oryza sativa	Asia	China	1978	SAMN06050082
FJ81221ZB11-14	Oryza sativa	Asia	China	1981	SAMN06050087
FJ81278	Oryza sativa	Asia	China	1981	SAMN06050150
FJ81-JY	Oryza sativa	Asia	China	1981	SAMN06050083
FJ81-MH	Oryza sativa	Asia	China	1981	SAMN06050084
FJ81-SW	Oryza sativa	Asia	China	1981	SAMN06050085
FJ81-ZP	Oryza sativa	Asia	China	1981	SAMN06050086
FJ86061ZE3-39	Oryza sativa	Asia	China	1986	SAMN06050089
FJ86-CT	Oryza sativa	Asia	China	1986	SAMN06050088
FJ95054B	Oryza sativa	Asia	China	1995	SAMN06050090
FJ95085AZB13-116	Oryza sativa	Asia	China	1995	SAMN06050091
FJ98099	Oryza sativa	Asia	China	1998	SAMN06050092
FJ99138	Oryza sativa	Asia	China	1999	SAMN06050093
FJSH0703	Oryza sativa	Asia	China	2007	SAMN06050094
GD-05-029b	Oryza sativa	Asia	China	2005	SAMN06050095
GD06-53	Oryza sativa	Asia	China	2006	SAMN06050096
GD08-2025	Oryza sativa	Asia	China	2008	SAMN06050097
GD22	Oryza sativa	Asia	China	2001	SAMN02740627
Glhn3	Oryza sativa	Asia	China	1990	SAMEA4751767
GX01	Oryza sativa	Asia	China	2001	SAMN02740629
H08-1a	Oryza sativa	Asia	China	2015	SAMN07267886
H08-1c	Oryza sativa	Asia	China	2015	SAMN07267887
HB12	Oryza sativa	Asia	China	2002	SAMN02740630
HB-14	Oryza sativa	Asia	China	2009	SAMN06050098
HB-LTH18	Oryza sativa	Asia	China	2009	SAMN06050099
HN06	Oryza sativa	Asia	China	2002	SAMN02740631
HN-0812-3	Oryza sativa	Asia	China	2008	SAMN06050100
HN10-1604	Oryza sativa	Asia	China	2010	SAMN06050102
HN-158	Oryza sativa	Asia	China	2009	SAMN06050101
JL10	Oryza sativa	Asia	China	2002	SAMN02740632
JS08-611	Oryza sativa	Asia	China	2008	SAMN06050104
JS09-138	Oryza sativa	Asia	China	2009	SAMN06050105
JS-10-6-1-2	Oryza sativa	Asia	China	2010	SAMN06050103
JS25	Oryza sativa	Asia	China	1998	SAMN02740633
JX-09Z116-1	Oryza sativa	Asia	China	2009	SAMN06050106
JX10-102	Oryza sativa	Asia	China	2010	SAMN06050107
JX11-141	Oryza sativa	Asia	China	2011	SAMN06050108
Mo98-06	Oryza sativa	Asia	China	1998	SAMN03010511
NX37	Oryza sativa	Asia	China	2001	SAMN02740634
SC05	Oryza sativa	Asia	China	2001	SAMN02740636
SC-10-120-65-2	Oryza sativa	Asia	China	2010	SAMN06050115
SC-10-25-44-1	Oryza sativa	Asia	China	2010	SAMN06050116
Y34	Oryza sativa	Asia	China	1982	SAMN02981398
YN07205e	Oryza sativa	Asia	China	2007	SAMN06050135
YN072310	Oryza sativa	Asia	China	2007	SAMN06050136
YN072311	Oryza sativa	Asia	China	2007	SAMN06050137
YN072313	Oryza sativa	Asia	China	2007	SAMN06050138
YN08181e	Oryza sativa	Asia	China	2008	SAMN06050139
YN08182c	Oryza sativa	Asia	China	2008	SAMN06050140
YN126311	Oryza sativa	Asia	China	2012	SAMN06050141
YN126441	Oryza sativa	Asia	China	2012	SAMN06050142
YN8773-19	Oryza sativa	Asia	China	1987	SAMN06050143
YN8773R-27	Oryza sativa	Asia	China	1987	SAMN06050144
ZJ00-10	Oryza sativa	Asia	China	2000	SAMN06050145
ZJ08-41	Oryza sativa	Asia	China	2008	SAMN06050146
ZJ2011-7-1	Oryza sativa	Asia	China	2011	SAMN06050147
TW-1-1-1-B-1	Oryza sativa	Asia	Taiwan, China	2005	SAMN06050117
TW-12CY-TB1-2	Oryza sativa	Asia	Taiwan, China	2012	SAMN06050118
TW-12HL-DF1-2	Oryza sativa	Asia	Taiwan, China	2012	SAMN06050119
TW-12HL-YL2-1	Oryza sativa	Asia	Taiwan, China	2012	SAMN06050120
TW-12TD-RH1-1	Oryza sativa	Asia	Taiwan, China	2012	SAMN06050121
TW-12TN-HB2-2	Oryza sativa	Asia	Taiwan, China	2012	SAMN06050122
TW-12YL-DL3-2	Oryza sativa	Asia	Taiwan, China	2012	SAMN06050123
TW-12YL-DP1-1	Oryza sativa	Asia	Taiwan, China	2012	SAMN06050124
TW-12YL-TT4-1	Oryza sativa	Asia	Taiwan, China	2012	SAMN06050125
TW-2-7-2-A-1	Oryza sativa	Asia	Taiwan, China	2005	SAMN06050126
TW-6-2-2-B-1	Oryza sativa	Asia	Taiwan, China	2005	SAMN06050127
TW-6-43-1	Oryza sativa	Asia	Taiwan, China	2005	SAMN06050128
TW-CYBP1-3	Oryza sativa	Asia	Taiwan, China	2011	SAMN06050129
TW-PT1-1	Oryza sativa	Asia	Taiwan, China	2011	SAMN06050130
TW-PT3-1	Oryza sativa	Asia	Taiwan, China	2011	SAMN06050131
TW-PT6-1	Oryza sativa	Asia	Taiwan, China	2011	SAMN06050132
TW-TN4-2	Oryza sativa	Asia	Taiwan, China	2011	SAMN06050133
MG01	Oryza sativa	Asia	India	2012	SAMN02397294
Mo-nwi-55	Oryza sativa	Asia	India	2010	SAMN02688647
RMg-Dl	Oryza sativa	Asia	India	2012	SAMN05425585
Mo1801.4	Oryza sativa	Asia	Japan	1976	SAMN02739928
Mo1836.3	Oryza sativa	Asia	Japan	1976	SAMN02739929
Mo401.4	Oryza sativa	Asia	Japan	1976	SAMN02739935
Mo4403.2	Oryza sativa	Asia	Japan	1976	SAMN02739933
Mo4603.4	Oryza sativa	Asia	Japan	1976	SAMN02739934
Mo903.4	Oryza sativa	Asia	Japan	1976	SAMN02739936
P131	Oryza sativa	Asia	Japan	NA	SAMN02981399
GOV41	Oryza sativa	Asia	South Korea	2002	SAMN02742174
K84-01	Oryza sativa	Asia	South Korea	1984	SAMN02742163
K88-07	Oryza sativa	Asia	South Korea	1998	SAMN02742164
K88-24	Oryza sativa	Asia	South Korea	1988	SAMN02742165
K91-10	Oryza sativa	Asia	South Korea	1991	SAMN02742166
K91-13	Oryza sativa	Asia	South Korea	1991	SAMN02742167
K91-30	Oryza sativa	Asia	South Korea	1991	SAMN02742168
K93-16	Oryza sativa	Asia	South Korea	1993	SAMN02742169
K96-07	Oryza sativa	Asia	South Korea	1996	SAMN02742170
K96-11	Oryza sativa	Asia	South Korea	1996	SAMN02742171
K98-02	Oryza sativa	Asia	South Korea	1998	SAMN02742172
K98-10	Oryza sativa	Asia	South Korea	1998	SAMN02742173
Mo10100	Oryza sativa	Asia	Thailand	2006	SAMN08712647
TH3	Oryza sativa	Asia	Thailand	NA	SAMEA4751774
FR13	Oryza sativa	Europe	France	1988	SAMN08009552
AG002	Oryza sativa	Europe	Italy	2010	SAMEA7473264
AG006	Oryza sativa	Europe	Italy	2011	SAMEA7473262
AG032	Oryza sativa	Europe	Italy	2011	SAMEA7473263
AG038	Oryza sativa	Europe	Italy	2011	SAMEA7473265
AG039	Oryza sativa	Europe	Italy	2011	SAMEA7473258
AG059	Oryza sativa	Europe	Italy	2011	SAMEA7473260
AG098	Oryza sativa	Europe	Italy	2011	SAMEA7473266
IT10	Oryza sativa	Europe	Italy	1989	SAMN02742175
PR003	Oryza sativa	Europe	Italy	2003	SAMEA7473261
San_andrea	Oryza sativa	Europe	Italy	2010	SAMEA7473259
PR72	Oryza sativa	Europe	Portugal	1992	SAMN02742176
BM1-24	Oryza sativa	North America	USA	1991	SAMN02742257
CA205	Oryza sativa	North America	USA	1997	SAMN02742258
IA1	Oryza sativa	North America	USA	2009	SAMN08009559
IB33	Oryza sativa	North America	USA	NA	SAMN08009560
IB49	Oryza sativa	North America	USA	1992	SAMN08009561
IC17	Oryza sativa	North America	USA	1992	SAMN08009562
IE1K	Oryza sativa	North America	USA	2003	SAMN08009563
JUM1	Oryza sativa	North America	USA	NA	SAMEA4753517
VO108	Oryza sativa	North America	USA	1964	SAMEA4751776
VO113	Oryza sativa	North America	USA	1967	SAMEA4751777
GUY11	Oryza sativa	South America	French Guiana	1978	SAMN06050151
Nich-2-3-2	Oryza sativa	South America	Suriname	2014	SAMN06050111
Nich-2-7-4	Oryza sativa	South America	Suriname	2014	SAMN06050112
Sar-2-20-1	Oryza sativa	South America	Suriname	2013	SAMN06050113
Sar-AD3-5	Oryza sativa	South America	Suriname	2013	SAMN06050114
1010-1	Oryza sativa	Asia	China	2020	In this study
1010-2	Oryza sativa	Asia	China	2020	In this study
111-12	Oryza sativa	Asia	China	2020	In this study
111-14	Oryza sativa	Asia	China	2020	In this study
111-15	Oryza sativa	Asia	China	2020	In this study
chajing-2	Oryza sativa	Asia	China	2020	In this study
chazhong8-2	Oryza sativa	Asia	China	2020	In this study
YN-XSBN-10	Oryza sativa	Asia	China	2020	In this study
YN-XSBN-11	Oryza sativa	Asia	China	2020	In this study
YN-XSBN-13	Oryza sativa	Asia	China	2020	In this study
HeN2020-2-5	Oryza sativa	Asia	China	2020	In this study
HeN2020-3-5	Oryza sativa	Asia	China	2020	In this study
HeN2020-4-5	Oryza sativa	Asia	China	2020	In this study
HeN2020-5-5	Oryza sativa	Asia	China	2020	In this study
HeN2020-6-5	Oryza sativa	Asia	China	2020	In this study
JSCS-9	Oryza sativa	Asia	China	2020	In this study
DB2020-1	Oryza sativa	Asia	China	2020	In this study
DB2020-1-5	Oryza sativa	Asia	China	2020	In this study
DB2020-2-5	Oryza sativa	Asia	China	2020	In this study
DB2020-3-5	Oryza sativa	Asia	China	2020	In this study
NJ-YN-6	Oryza sativa	Asia	China	2020	In this study
NJ-YN-9	Oryza sativa	Asia	China	2020	In this study

## Sheet: 2.Time-geograph information
Time	Contiment	Country	Number
1970s	Asia	China	8
		Japan	1
	South America	French Guiana	1
1980s	Asia	China	12
		South Korea	2
	Africa	Puerto Rico	1
	Europe	France	1
		Italy	1
1990s	Asia	China	14
		South Korea	9
	North America	USA	4
	Europe	Portugal	1
	Africa	Mali	1
		Egypt	1
2000s	Asia	China	35+4(Taiwan island)
		South Korea	1
		Thailand	1
	Europe	Italy	1
	North America	USA	2
	Africa	Nigeria	2
2010s	Africa	Benin	1
		Burkina Faso	4
		Ghana	4
		Kenya	14
		Nigeria	2
		Tanzania	1
		Togo	1
		Uganda	1
	Aisa	India	5
		China	21+ 13(Taiwan island)
	Europe	Italy	8
	South America	Suriname	4
2020	Asia	China	22
