# Supplementary material for: Human-Activity-Mediated Gene Flows Are Involved in the Establishment of Magnaporthe oryzae Population Structures: A Population Genomic Analysis
Source: Preprints.org preprint supplement (doi:10.20944/preprints202408.2221.v1), 2024-08-30
Supplement: Supplementary file 2 [file Table S2 Cross Validation error for different models.xls]

## Sheet: Sheet1
K	CV error
2	0.29114
3	0.26093
4	0.27976
5	0.27441
6	0.27485
7	0.27001
8	0.27255
9	0.27416
10	0.27506
