# Supplementary material for: Human-Activity-Mediated Gene Flows Are Involved in the Establishment of Magnaporthe oryzae Population Structures: A Population Genomic Analysis
Source: Preprints.org preprint supplement (doi:10.20944/preprints202408.2221.v1), 2024-08-30
Supplement: Supplementary file 3 [file Table S3 Genetic differentiation among populations (Fst)..xls]

## Sheet: Sheet1
	Asia	Africa	Europe	North America	South America
Asia	0
Africa	0.127	0
Europe	0.103	0.128	0
North America	0.093	0.237	0.088	0
South America	0.147	0.214	0.118	0.134	0
